# Supplementary material
Source: publisher figshare collection journal article supplement (https://acs.figshare.com/ndownloader/files/5155912)
Supplement: Supplementary file 1 [file 5155912]

#==============================================================================
data_global
#==============================================================================

_audit_creation_date               02-April-2004
_audit_creation_method             SHELXTL
_audit_update_record
; ?
;

# 1. Submission Details

_publ_contact_author_name         'Ulli Englert'
_publ_contact_author_address
;
      Institut fuer Anorganische Chemie
      RWTH Aachen
      Prof.-Pirlet-Str.1
      52074 Aachen
      Germany
;
_publ_contact_author_email         'ullrich.englert@ac.rwth-aachen.de'
_publ_contact_author_fax           '0049-241-8092288'
_publ_contact_author_phone         '0049-241-8094666'

_publ_requested_journal            'Organometallics'
_publ_requested_category           ?
_publ_requested_coeditor_name      ?

_publ_contact_letter
; ?
;


# 2. Processing Summary (IUCr Office Use Only)

_journal_date_recd_electronic     ?
_journal_date_to_coeditor         ?
_journal_date_from_coeditor       ?
_journal_date_accepted            ?

_journal_date_printers_first      ?
_journal_date_printers_final      ?
_journal_date_proofs_out          ?
_journal_date_proofs_in           ?


_journal_coeditor_name            ?
_journal_coeditor_code            ?
_journal_coeditor_notes
; ?
;

_journal_techeditor_code          ?
_journal_techeditor_notes
; ?
;

_journal_coden_ASTM               ?
_journal_name_full                ?
_journal_year                     ?
_journal_volume                   ?

_journal_issue                    ?
_journal_page_first               ?
_journal_page_last                ?

_journal_suppl_publ_number        ?
_journal_suppl_publ_pages         ?

# 3. Title and Author List

_publ_section_title
; see text
;

# The loop structure below should contain the names  and addresses of all
# authors, in the required order of publication. Repeat as necessary.

loop_
_publ_author_name
_publ_author_address
      'Englert, Ulli'          #<--'Last name,  first name'
;     Institut fuer Anorganische Chemie
      RWTH Aachen
      Prof.-Pirlet-Str. 1
      52074 Aachen
      Germany
;
      'Hu, Chunhua'            #<--'Last name,  first name'
;     Institut fuer Anorganische Chemie
      RWTH Aachen
      Prof.-Pirlet-Str. 1
      52074 Aachen
      Germany
;
      'Salzer, Albrecht'       #<--'Last name,  first name'
;     Institut fuer Anorganische Chemie
      RWTH Aachen
      Prof.-Pirlet-Str. 1
      52074 Aachen
      Germany
;
      'Alberico, Elisabetta'   #<--'Last name,  first name'
;     Institute for Biomolecular Chemistry 
      National Research Council 
      I 07040 Sassari 
      Italy 
;

# 4. Text

_publ_section_abstract
; see text
;

_publ_section_comment
; see text
;

_publ_section_exptl_prep
; see text
;

_publ_section_exptl_refinement
; see text
;

_publ_section_references
; see text
;

_publ_section_figure_captions
; see text
;

_publ_section_table_legends
; see text
;

_publ_section_acknowledgements
; see text
;

#==========================================================================
 
data_4 
 
_chemical_name_systematic 
; 
 compound code syn-(S,Sp)-4 
; 
_chemical_name_common             ? 
_chemical_melting_point           ? 
_chemical_formula_moiety          ? 
_chemical_formula_sum 
 'C26 H24 Cr N O3 P' 
_chemical_formula_weight          481.43 
_chemical_absolute_configuration  ad 
loop_ 
 _atom_type_symbol 
 _atom_type_description 
 _atom_type_scat_dispersion_real 
 _atom_type_scat_dispersion_imag 
 _atom_type_scat_source 
 'Cr'  'Cr'   0.3209   0.6236 
 'International Tables Vol C Tables 4.2.6.8 and 6.1.1.4' 
 'P'  'P'   0.1023   0.0942 
 'International Tables Vol C Tables 4.2.6.8 and 6.1.1.4' 
 'O'  'O'   0.0106   0.0060 
 'International Tables Vol C Tables 4.2.6.8 and 6.1.1.4' 
 'N'  'N'   0.0061   0.0033 
 'International Tables Vol C Tables 4.2.6.8 and 6.1.1.4' 
 'C'  'C'   0.0033   0.0016 
 'International Tables Vol C Tables 4.2.6.8 and 6.1.1.4' 
 'H'  'H'   0.0000   0.0000 
 'International Tables Vol C Tables 4.2.6.8 and 6.1.1.4' 
 
_symmetry_cell_setting            orthorhombic 
_symmetry_space_group_name_H-M    P2(1)2(1)2(1) 
 
loop_ 
 _symmetry_equiv_pos_as_xyz 
 'x, y, z' 
 '-x+1/2, -y, z+1/2' 
 'x+1/2, -y+1/2, -z' 
 '-x, y+1/2, -z+1/2' 
 
_cell_length_a                    10.399(3) 
_cell_length_b                    12.562(5) 
_cell_length_c                    18.042(5) 
_cell_angle_alpha                 90.00 
_cell_angle_beta                  90.00 
_cell_angle_gamma                 90.00 
_cell_volume                      2356.9(13) 
_cell_formula_units_Z             4 
_cell_measurement_temperature     253(2) 
_cell_measurement_reflns_used     25 
_cell_measurement_theta_min       7 
_cell_measurement_theta_max       14 
 
_exptl_crystal_description        plate
_exptl_crystal_colour             yellow
_exptl_crystal_size_max           0.48 
_exptl_crystal_size_mid           0.40 
_exptl_crystal_size_min           0.20 
_exptl_crystal_density_meas       ? 
_exptl_crystal_density_diffrn     1.357 
_exptl_crystal_density_method     'not measured' 
_exptl_crystal_F_000              1000 
_exptl_absorpt_coefficient_mu     0.581 
_exptl_absorpt_correction_type    empirical
_exptl_absorpt_correction_T_min   0.938 
_exptl_absorpt_correction_T_max   1.000 
_exptl_absorpt_process_details    'PSI scans' 
 
_exptl_special_details 
; 
 ? 
; 
 
_diffrn_ambient_temperature       253(2) 
_diffrn_radiation_wavelength      0.71070 
_diffrn_radiation_type            MoK\a 
_diffrn_radiation_source          'fine-focus sealed tube' 
_diffrn_radiation_monochromator   graphite 
_diffrn_measurement_device_type   Enraf_Nonius_CAD4
_diffrn_measurement_method        \q/2\q 
_diffrn_detector_area_resol_mean  ? 
_diffrn_standards_number          3 
_diffrn_standards_interval_count  ? 
_diffrn_standards_interval_time   120 
_diffrn_standards_decay_%         1.43 
_diffrn_reflns_number             6798 
_diffrn_reflns_av_R_equivalents   0.0740 
_diffrn_reflns_av_sigmaI/netI     0.1532 
_diffrn_reflns_limit_h_min        0 
_diffrn_reflns_limit_h_max        12 
_diffrn_reflns_limit_k_min        -14 
_diffrn_reflns_limit_k_max        14 
_diffrn_reflns_limit_l_min        -21 
_diffrn_reflns_limit_l_max        21 
_diffrn_reflns_theta_min          3.24 
_diffrn_reflns_theta_max          25.10 
_reflns_number_total              4184 
_reflns_number_gt                 2502 
_reflns_threshold_expression      >2sigma(I) 
 
_computing_data_collection        'CAD4 (Enraf-Nonius, 1977)'
_computing_cell_refinement        'CAD4 (Enraf-Nonius, 1977)'
_computing_data_reduction         'PROCESS_MolEN (Fair, 1990)'
_computing_structure_solution     'SHELXTL (Sheldrick, 1998)' 
_computing_structure_refinement   'SHELXTL (Sheldrick, 1998)' 
_computing_molecular_graphics     'Platon (Spek, 2003)'
_computing_publication_material   ? 
 
_refine_special_details 
; 
 Refinement of F^2^ against ALL reflections.  The weighted R-factor wR and 
 goodness of fit S are based on F^2^, conventional R-factors R are based 
 on F, with F set to zero for negative F^2^. The threshold expression of 
 F^2^ > 2sigma(F^2^) is used only for calculating R-factors(gt) etc. and is 
 not relevant to the choice of reflections for refinement.  R-factors based 
 on F^2^ are statistically about twice as large as those based on F, and R- 
 factors based on ALL data will be even larger. 
; 
 
_refine_ls_structure_factor_coef  Fsqd  
_refine_ls_matrix_type            full 
_refine_ls_weighting_scheme       calc  
_refine_ls_weighting_details 
 'calc w=1/[\s^2^(Fo^2^)+(0.0326P)^2^+0.0000P] where P=(Fo^2^+2Fc^2^)/3' 
_atom_sites_solution_primary      direct 
_atom_sites_solution_secondary    difmap 
_atom_sites_solution_hydrogens    geom 
_refine_ls_hydrogen_treatment     constr 
_refine_ls_extinction_method      none 
_refine_ls_extinction_coef        ? 
_refine_ls_abs_structure_details 
 'Flack H D (1983), Acta Cryst. A39, 876-881' 
_refine_ls_abs_structure_Flack    0.04(4) 
_refine_ls_number_reflns          4184 
_refine_ls_number_parameters      289 
_refine_ls_number_restraints      0 
_refine_ls_R_factor_all           0.1411 
_refine_ls_R_factor_gt            0.0704 
_refine_ls_wR_factor_ref          0.1156 
_refine_ls_wR_factor_gt           0.1052 
_refine_ls_goodness_of_fit_ref    1.061 
_refine_ls_restrained_S_all       1.061 
_refine_ls_shift/su_max           0.000 
_refine_ls_shift/su_mean          0.000 
 
loop_ 
 _atom_site_label 
 _atom_site_type_symbol 
 _atom_site_fract_x 
 _atom_site_fract_y 
 _atom_site_fract_z 
 _atom_site_U_iso_or_equiv 
 _atom_site_adp_type 
 _atom_site_occupancy 
 _atom_site_symmetry_multiplicity 
 _atom_site_calc_flag 
 _atom_site_refinement_flags 
 _atom_site_disorder_assembly 
 _atom_site_disorder_group 
Cr Cr 0.10802(9) 0.38342(7) 0.06131(5) 0.0420(3) Uani 1 1 d . . . 
P P 0.39531(18) 0.47447(11) 0.16555(8) 0.0377(4) Uani 1 1 d . . . 
C1 C 0.0999(7) 0.5233(5) 0.0883(3) 0.0505(16) Uani 1 1 d . . . 
O1 O 0.0849(5) 0.6112(3) 0.1057(2) 0.0719(14) Uani 1 1 d . . . 
C2 C 0.0111(7) 0.4154(5) -0.0202(4) 0.0551(19) Uani 1 1 d . . . 
O2 O -0.0502(5) 0.4330(4) -0.0718(2) 0.0867(18) Uani 1 1 d . . . 
C3 C -0.0422(7) 0.3660(6) 0.1101(4) 0.0502(18) Uani 1 1 d . . . 
O3 O -0.1385(4) 0.3605(4) 0.1415(3) 0.0829(18) Uani 1 1 d . . . 
C11 C 0.3103(5) 0.3757(5) 0.1085(3) 0.0302(13) Uani 1 1 d . . . 
C12 C 0.2356(6) 0.2956(5) 0.1410(3) 0.0425(16) Uani 1 1 d . . . 
C13 C 0.1647(6) 0.2211(5) 0.0975(5) 0.059(2) Uani 1 1 d . . . 
C14 C 0.1700(7) 0.2257(5) 0.0197(5) 0.068(2) Uani 1 1 d . . . 
H14 H 0.1226 0.1746 -0.0109 0.088 Uiso 1 1 calc R . . 
C15 C 0.2434(7) 0.3039(6) -0.0119(4) 0.058(2) Uani 1 1 d . . . 
H15 H 0.2473 0.3083 -0.0661 0.075 Uiso 1 1 calc R . . 
C16 C 0.3115(5) 0.3763(5) 0.0290(3) 0.0426(15) Uani 1 1 d . . . 
H16 H 0.3628 0.4303 0.0032 0.055 Uiso 1 1 calc R . . 
C17 C 0.2243(7) 0.2632(5) 0.2209(4) 0.058(2) Uani 1 1 d . . . 
H17 H 0.2969 0.2153 0.2301 0.076 Uiso 1 1 calc R . . 
C18 C 0.1037(8) 0.1925(6) 0.2229(5) 0.087(3) Uani 1 1 d . . . 
H18A H 0.1113 0.1379 0.2615 0.114 Uiso 1 1 calc R . . 
H18B H 0.0266 0.2351 0.2324 0.114 Uiso 1 1 calc R . . 
C19 C 0.0979(8) 0.1417(5) 0.1463(5) 0.093(3) Uani 1 1 d . . . 
H19A H 0.1426 0.0730 0.1458 0.121 Uiso 1 1 calc R . . 
H19B H 0.0086 0.1310 0.1305 0.121 Uiso 1 1 calc R . . 
C21 C 0.4923(5) 0.5433(4) 0.0950(3) 0.0336(14) Uani 1 1 d . . . 
C22 C 0.4336(5) 0.6254(5) 0.0555(3) 0.0498(16) Uani 1 1 d . . . 
H22 H 0.3433 0.6430 0.0652 0.065 Uiso 1 1 calc R . . 
C23 C 0.5015(7) 0.6822(5) 0.0028(4) 0.059(2) Uani 1 1 d . . . 
H23 H 0.4585 0.7387 -0.0253 0.077 Uiso 1 1 calc R . . 
C24 C 0.6280(7) 0.6603(5) -0.0104(4) 0.057(2) Uani 1 1 d . . . 
H24 H 0.6766 0.7007 -0.0476 0.074 Uiso 1 1 calc R . . 
C25 C 0.6844(7) 0.5822(5) 0.0286(4) 0.057(2) Uani 1 1 d . . . 
H25 H 0.7753 0.5666 0.0193 0.075 Uiso 1 1 calc R . . 
C26 C 0.6197(6) 0.5226(4) 0.0813(3) 0.0469(16) Uani 1 1 d . . . 
H26 H 0.6645 0.4662 0.1086 0.061 Uiso 1 1 calc R . . 
C31 C 0.5161(6) 0.3902(5) 0.2090(3) 0.0392(14) Uani 1 1 d . . . 
C32 C 0.5476(6) 0.2880(5) 0.1867(3) 0.0414(16) Uani 1 1 d . . . 
H32 H 0.5049 0.2575 0.1433 0.054 Uiso 1 1 calc R . . 
C33 C 0.6372(6) 0.2286(5) 0.2241(4) 0.054(2) Uani 1 1 d . . . 
H33 H 0.6567 0.1559 0.2081 0.070 Uiso 1 1 calc R . . 
C34 C 0.6990(7) 0.2715(6) 0.2837(4) 0.067(2) Uani 1 1 d . . . 
H34 H 0.7629 0.2293 0.3108 0.087 Uiso 1 1 calc R . . 
C35 C 0.6716(7) 0.3743(7) 0.3059(4) 0.074(2) Uani 1 1 d . . . 
H35 H 0.7183 0.4061 0.3475 0.097 Uiso 1 1 calc R . . 
C36 C 0.5792(7) 0.4314(6) 0.2697(3) 0.059(2) Uani 1 1 d . . . 
H36 H 0.5575 0.5030 0.2871 0.077 Uiso 1 1 calc R . . 
N N 0.2387(6) 0.3500(5) 0.2740(3) 0.0641(18) Uani 1 1 d . . . 
C4 C 0.2870(8) 0.3156(7) 0.3456(3) 0.108(3) Uani 1 1 d . . . 
H4A H 0.2938 0.3759 0.3781 0.141 Uiso 1 1 calc R . . 
H4B H 0.3702 0.2837 0.3395 0.141 Uiso 1 1 calc R . . 
H4C H 0.2289 0.2645 0.3666 0.141 Uiso 1 1 calc R . . 
C5 C 0.1296(7) 0.4219(6) 0.2814(3) 0.082(3) Uani 1 1 d . . . 
H5A H 0.1494 0.4760 0.3172 0.106 Uiso 1 1 calc R . . 
H5B H 0.0556 0.3825 0.2974 0.106 Uiso 1 1 calc R . . 
H5C H 0.1120 0.4545 0.2343 0.106 Uiso 1 1 calc R . . 
 
loop_ 
 _atom_site_aniso_label 
 _atom_site_aniso_U_11 
 _atom_site_aniso_U_22 
 _atom_site_aniso_U_33 
 _atom_site_aniso_U_23 
 _atom_site_aniso_U_13 
 _atom_site_aniso_U_12 
Cr 0.0342(6) 0.0361(5) 0.0558(6) -0.0017(5) -0.0029(6) 0.0012(6) 
P 0.0404(10) 0.0345(8) 0.0380(8) -0.0014(7) 0.0014(10) 0.0031(10) 
C1 0.036(4) 0.050(4) 0.065(4) 0.002(3) -0.002(4) 0.008(4) 
O1 0.068(4) 0.037(2) 0.110(4) -0.012(3) -0.009(3) 0.018(3) 
C2 0.065(5) 0.050(4) 0.051(4) -0.003(4) 0.003(4) 0.013(4) 
O2 0.092(4) 0.108(4) 0.060(3) -0.001(3) -0.018(3) 0.022(3) 
C3 0.033(4) 0.054(5) 0.064(5) 0.004(4) 0.001(4) 0.004(4) 
O3 0.048(3) 0.108(4) 0.093(4) 0.028(3) 0.019(3) -0.003(3) 
C11 0.026(3) 0.028(3) 0.037(4) 0.006(3) 0.009(3) 0.004(3) 
C12 0.036(4) 0.041(4) 0.051(4) 0.011(3) 0.000(3) 0.010(4) 
C13 0.034(4) 0.031(4) 0.112(6) 0.008(4) -0.012(5) 0.004(4) 
C14 0.057(6) 0.043(5) 0.103(7) -0.025(5) -0.015(5) 0.011(4) 
C15 0.037(5) 0.066(5) 0.070(5) -0.026(4) 0.003(4) -0.007(4) 
C16 0.037(4) 0.042(3) 0.049(4) -0.009(3) 0.003(3) 0.000(4) 
C17 0.039(5) 0.050(4) 0.087(6) 0.031(4) 0.011(4) 0.014(4) 
C18 0.048(5) 0.083(5) 0.132(7) 0.070(5) 0.010(6) -0.004(6) 
C19 0.068(6) 0.044(4) 0.168(8) 0.029(5) -0.020(7) 0.000(5) 
C21 0.028(4) 0.033(3) 0.040(3) -0.005(3) -0.003(3) -0.004(3) 
C22 0.036(4) 0.053(4) 0.061(4) 0.017(4) -0.003(4) -0.002(4) 
C23 0.054(5) 0.061(4) 0.062(4) 0.020(4) -0.003(4) -0.005(4) 
C24 0.062(6) 0.047(4) 0.063(5) 0.012(3) 0.016(4) -0.018(4) 
C25 0.045(5) 0.049(4) 0.079(5) -0.011(4) 0.013(4) -0.002(4) 
C26 0.051(5) 0.033(3) 0.057(4) 0.002(3) 0.011(4) 0.006(4) 
C31 0.044(4) 0.045(4) 0.029(3) 0.005(3) -0.002(3) -0.003(4) 
C32 0.040(4) 0.036(4) 0.048(4) 0.005(3) 0.004(3) 0.006(3) 
C33 0.044(5) 0.045(4) 0.073(5) 0.019(4) -0.005(4) 0.013(4) 
C34 0.054(5) 0.080(6) 0.067(5) 0.037(4) -0.013(4) 0.003(5) 
C35 0.076(6) 0.077(5) 0.070(5) 0.007(5) -0.028(4) 0.006(5) 
C36 0.066(6) 0.066(4) 0.046(4) 0.009(4) -0.006(4) 0.005(4) 
N 0.057(4) 0.092(5) 0.044(3) 0.029(3) 0.008(3) 0.018(4) 
C4 0.093(7) 0.171(8) 0.061(5) 0.053(5) 0.018(5) 0.037(7) 
C5 0.071(6) 0.112(7) 0.061(5) 0.010(4) 0.021(5) 0.015(6) 
 
_geom_special_details 
; 
 All esds (except the esd in the dihedral angle between two l.s. planes) 
 are estimated using the full covariance matrix.  The cell esds are taken 
 into account individually in the estimation of esds in distances, angles 
 and torsion angles; correlations between esds in cell parameters are only 
 used when they are defined by crystal symmetry.  An approximate (isotropic) 
 treatment of cell esds is used for estimating esds involving l.s. planes. 
; 
 
loop_ 
 _geom_bond_atom_site_label_1 
 _geom_bond_atom_site_label_2 
 _geom_bond_distance 
 _geom_bond_site_symmetry_2 
 _geom_bond_publ_flag 
Cr C3 1.806(7) . ? 
Cr C1 1.825(7) . ? 
Cr C2 1.828(7) . ? 
Cr C15 2.174(7) . ? 
Cr C16 2.197(6) . ? 
Cr C14 2.214(6) . ? 
Cr C13 2.221(6) . ? 
Cr C12 2.246(6) . ? 
Cr C11 2.271(5) . ? 
P C31 1.820(6) . ? 
P C11 1.839(6) . ? 
P C21 1.840(6) . ? 
C1 O1 1.158(6) . ? 
C2 O2 1.148(7) . ? 
C3 O3 1.153(7) . ? 
C11 C12 1.399(8) . ? 
C11 C16 1.434(6) . ? 
C12 C13 1.427(8) . ? 
C12 C17 1.502(8) . ? 
C13 C14 1.406(9) . ? 
C13 C19 1.501(9) . ? 
C14 C15 1.368(9) . ? 
C14 H14 0.9800 . ? 
C15 C16 1.369(8) . ? 
C15 H15 0.9800 . ? 
C16 H16 0.9800 . ? 
C17 N 1.460(8) . ? 
C17 C18 1.538(9) . ? 
C17 H17 0.9800 . ? 
C18 C19 1.523(9) . ? 
C18 H18A 0.9800 . ? 
C18 H18B 0.9800 . ? 
C19 H19A 0.9800 . ? 
C19 H19B 0.9800 . ? 
C21 C26 1.373(8) . ? 
C21 C22 1.394(7) . ? 
C22 C23 1.383(8) . ? 
C22 H22 0.9800 . ? 
C23 C24 1.365(9) . ? 
C23 H23 0.9800 . ? 
C24 C25 1.342(8) . ? 
C24 H24 0.9800 . ? 
C25 C26 1.385(8) . ? 
C25 H25 0.9800 . ? 
C26 H26 0.9800 . ? 
C31 C36 1.378(7) . ? 
C31 C32 1.384(8) . ? 
C32 C33 1.371(8) . ? 
C32 H32 0.9800 . ? 
C33 C34 1.363(8) . ? 
C33 H33 0.9800 . ? 
C34 C35 1.382(10) . ? 
C34 H34 0.9800 . ? 
C35 C36 1.365(9) . ? 
C35 H35 0.9800 . ? 
C36 H36 0.9800 . ? 
N C4 1.452(7) . ? 
N C5 1.455(8) . ? 
C4 H4A 0.9600 . ? 
C4 H4B 0.9600 . ? 
C4 H4C 0.9600 . ? 
C5 H5A 0.9600 . ? 
C5 H5B 0.9600 . ? 
C5 H5C 0.9600 . ? 
 
loop_ 
 _geom_angle_atom_site_label_1 
 _geom_angle_atom_site_label_2 
 _geom_angle_atom_site_label_3 
 _geom_angle 
 _geom_angle_site_symmetry_1 
 _geom_angle_site_symmetry_3 
 _geom_angle_publ_flag 
C3 Cr C1 86.9(3) . . ? 
C3 Cr C2 86.7(3) . . ? 
C1 Cr C2 88.7(3) . . ? 
C3 Cr C15 143.2(3) . . ? 
C1 Cr C15 129.4(3) . . ? 
C2 Cr C15 88.2(3) . . ? 
C3 Cr C16 163.2(3) . . ? 
C1 Cr C16 98.9(3) . . ? 
C2 Cr C16 109.1(3) . . ? 
C15 Cr C16 36.5(2) . . ? 
C3 Cr C14 108.0(3) . . ? 
C1 Cr C14 164.8(3) . . ? 
C2 Cr C14 94.8(3) . . ? 
C15 Cr C14 36.3(2) . . ? 
C16 Cr C14 66.0(3) . . ? 
C3 Cr C13 88.6(3) . . ? 
C1 Cr C13 144.8(3) . . ? 
C2 Cr C13 125.8(3) . . ? 
C15 Cr C13 65.5(3) . . ? 
C16 Cr C13 77.6(2) . . ? 
C14 Cr C13 37.0(2) . . ? 
C3 Cr C12 98.0(3) . . ? 
C1 Cr C12 109.2(3) . . ? 
C2 Cr C12 161.6(3) . . ? 
C15 Cr C12 77.3(2) . . ? 
C16 Cr C12 65.2(2) . . ? 
C14 Cr C12 66.8(2) . . ? 
C13 Cr C12 37.2(2) . . ? 
C3 Cr C11 127.8(2) . . ? 
C1 Cr C11 89.1(3) . . ? 
C2 Cr C11 145.3(3) . . ? 
C15 Cr C11 66.9(2) . . ? 
C16 Cr C11 37.38(16) . . ? 
C14 Cr C11 79.6(2) . . ? 
C13 Cr C11 66.7(2) . . ? 
C12 Cr C11 36.1(2) . . ? 
C31 P C11 100.4(3) . . ? 
C31 P C21 101.1(3) . . ? 
C11 P C21 101.1(2) . . ? 
O1 C1 Cr 174.9(7) . . ? 
O2 C2 Cr 178.4(6) . . ? 
O3 C3 Cr 176.5(7) . . ? 
C12 C11 C16 115.4(6) . . ? 
C12 C11 P 121.1(4) . . ? 
C16 C11 P 123.5(5) . . ? 
C12 C11 Cr 71.0(3) . . ? 
C16 C11 Cr 68.5(3) . . ? 
P C11 Cr 128.8(3) . . ? 
C11 C12 C13 121.9(5) . . ? 
C11 C12 C17 129.8(6) . . ? 
C13 C12 C17 108.0(6) . . ? 
C11 C12 Cr 72.9(3) . . ? 
C13 C12 Cr 70.4(3) . . ? 
C17 C12 Cr 134.5(5) . . ? 
C14 C13 C12 120.1(7) . . ? 
C14 C13 C19 129.2(7) . . ? 
C12 C13 C19 110.6(7) . . ? 
C14 C13 Cr 71.2(4) . . ? 
C12 C13 Cr 72.3(3) . . ? 
C19 C13 Cr 131.3(5) . . ? 
C15 C14 C13 117.9(7) . . ? 
C15 C14 Cr 70.2(4) . . ? 
C13 C14 Cr 71.8(4) . . ? 
C15 C14 H14 121.1 . . ? 
C13 C14 H14 121.1 . . ? 
Cr C14 H14 129.1 . . ? 
C14 C15 C16 122.7(6) . . ? 
C14 C15 Cr 73.5(4) . . ? 
C16 C15 Cr 72.7(4) . . ? 
C14 C15 H15 118.6 . . ? 
C16 C15 H15 118.6 . . ? 
Cr C15 H15 127.4 . . ? 
C15 C16 C11 122.0(6) . . ? 
C15 C16 Cr 70.8(4) . . ? 
C11 C16 Cr 74.1(3) . . ? 
C15 C16 H16 119.0 . . ? 
C11 C16 H16 119.0 . . ? 
Cr C16 H16 128.5 . . ? 
N C17 C12 114.8(5) . . ? 
N C17 C18 120.0(6) . . ? 
C12 C17 C18 104.1(6) . . ? 
N C17 H17 105.6 . . ? 
C12 C17 H17 105.6 . . ? 
C18 C17 H17 105.6 . . ? 
C19 C18 C17 104.6(7) . . ? 
C19 C18 H18A 110.8 . . ? 
C17 C18 H18A 110.8 . . ? 
C19 C18 H18B 110.8 . . ? 
C17 C18 H18B 110.8 . . ? 
H18A C18 H18B 108.9 . . ? 
C13 C19 C18 103.6(6) . . ? 
C13 C19 H19A 111.0 . . ? 
C18 C19 H19A 111.0 . . ? 
C13 C19 H19B 111.0 . . ? 
C18 C19 H19B 111.0 . . ? 
H19A C19 H19B 109.0 . . ? 
C26 C21 C22 118.1(5) . . ? 
C26 C21 P 124.4(5) . . ? 
C22 C21 P 117.4(4) . . ? 
C23 C22 C21 120.6(6) . . ? 
C23 C22 H22 119.7 . . ? 
C21 C22 H22 119.7 . . ? 
C24 C23 C22 120.6(6) . . ? 
C24 C23 H23 119.7 . . ? 
C22 C23 H23 119.7 . . ? 
C25 C24 C23 118.5(6) . . ? 
C25 C24 H24 120.8 . . ? 
C23 C24 H24 120.8 . . ? 
C24 C25 C26 122.9(7) . . ? 
C24 C25 H25 118.6 . . ? 
C26 C25 H25 118.6 . . ? 
C21 C26 C25 119.3(6) . . ? 
C21 C26 H26 120.3 . . ? 
C25 C26 H26 120.3 . . ? 
C36 C31 C32 117.8(6) . . ? 
C36 C31 P 116.9(5) . . ? 
C32 C31 P 125.3(5) . . ? 
C33 C32 C31 121.6(6) . . ? 
C33 C32 H32 119.2 . . ? 
C31 C32 H32 119.2 . . ? 
C34 C33 C32 119.5(6) . . ? 
C34 C33 H33 120.2 . . ? 
C32 C33 H33 120.2 . . ? 
C33 C34 C35 120.0(7) . . ? 
C33 C34 H34 120.0 . . ? 
C35 C34 H34 120.0 . . ? 
C36 C35 C34 119.8(7) . . ? 
C36 C35 H35 120.1 . . ? 
C34 C35 H35 120.1 . . ? 
C35 C36 C31 121.2(7) . . ? 
C35 C36 H36 119.4 . . ? 
C31 C36 H36 119.4 . . ? 
C4 N C5 111.9(6) . . ? 
C4 N C17 113.4(6) . . ? 
C5 N C17 116.3(6) . . ? 
N C4 H4A 109.5 . . ? 
N C4 H4B 109.5 . . ? 
H4A C4 H4B 109.5 . . ? 
N C4 H4C 109.5 . . ? 
H4A C4 H4C 109.5 . . ? 
H4B C4 H4C 109.5 . . ? 
N C5 H5A 109.5 . . ? 
N C5 H5B 109.5 . . ? 
H5A C5 H5B 109.5 . . ? 
N C5 H5C 109.5 . . ? 
H5A C5 H5C 109.5 . . ? 
H5B C5 H5C 109.5 . . ? 
 
_diffrn_measured_fraction_theta_max    0.997 
_diffrn_reflns_theta_full              25.10 
_diffrn_measured_fraction_theta_full   0.997 
_refine_diff_density_max    0.469 
_refine_diff_density_min   -0.269 
_refine_diff_density_rms    0.064 

#===END  

data_6a
 
_chemical_name_systematic 
; 
 compound code (S,Rp)-6a.benzene
; 
_chemical_name_common             ? 
_chemical_melting_point           ? 
_chemical_formula_moiety          ? 
_chemical_formula_sum 
 'C42 H34 Cr O3 P2' 
_chemical_formula_weight          700.63 
_chemical_absolute_configuration  ad 
 
loop_ 
 _atom_type_symbol 
 _atom_type_description 
 _atom_type_scat_dispersion_real 
 _atom_type_scat_dispersion_imag 
 _atom_type_scat_source 
 'C'  'C'   0.0033   0.0016 
 'International Tables Vol C Tables 4.2.6.8 and 6.1.1.4' 
 'H'  'H'   0.0000   0.0000 
 'International Tables Vol C Tables 4.2.6.8 and 6.1.1.4' 
 'O'  'O'   0.0106   0.0060 
 'International Tables Vol C Tables 4.2.6.8 and 6.1.1.4' 
 'P'  'P'   0.1023   0.0942 
 'International Tables Vol C Tables 4.2.6.8 and 6.1.1.4' 
 'Cr'  'Cr'   0.3209   0.6236 
 'International Tables Vol C Tables 4.2.6.8 and 6.1.1.4' 
 
_symmetry_cell_setting            Monoclinic 
_symmetry_space_group_name_H-M    P2(1)

 
loop_ 
 _symmetry_equiv_pos_as_xyz 
 'x, y, z' 
 '-x, y+1/2, -z' 
 
_cell_length_a                    10.7821(17) 
_cell_length_b                    13.220(7) 
_cell_length_c                    12.5118(18) 
_cell_angle_alpha                 90.00 
_cell_angle_beta                  100.691(12) 
_cell_angle_gamma                 90.00 
_cell_volume                      1752.4(10) 
_cell_formula_units_Z             2 
_cell_measurement_temperature     228(2) 
_cell_measurement_reflns_used     25 
_cell_measurement_theta_min       10 
_cell_measurement_theta_max       13
 
_exptl_crystal_description        block 
_exptl_crystal_colour             yellow 
_exptl_crystal_size_max           0.64 
_exptl_crystal_size_mid           0.48 
_exptl_crystal_size_min           0.44 
_exptl_crystal_density_meas       ? 
_exptl_crystal_density_diffrn     1.328 
_exptl_crystal_density_method     'not measured' 
_exptl_crystal_F_000              728 
_exptl_absorpt_coefficient_mu     0.457 
_exptl_absorpt_correction_type    empirical
_exptl_absorpt_correction_T_min   0.7587 
_exptl_absorpt_correction_T_max   0.8243 
_exptl_absorpt_process_details    'PSI scans'
 
_exptl_special_details 
; 
 ? 
; 
 
_diffrn_ambient_temperature       228(2) 
_diffrn_radiation_wavelength      0.71073 
_diffrn_radiation_type            MoK\a 
_diffrn_radiation_source          'fine-focus sealed tube' 
_diffrn_radiation_monochromator   graphite 
_diffrn_measurement_device_type   Enraf_Nonius_CAD4
_diffrn_measurement_method        \q/2\q 
_diffrn_detector_area_resol_mean  ? 
_diffrn_standards_number          3 
_diffrn_standards_interval_count  ? 
_diffrn_standards_interval_time   120 
_diffrn_standards_decay_%         2.24 
_diffrn_reflns_number             7476 
_diffrn_reflns_av_R_equivalents   0.0999 
_diffrn_reflns_av_sigmaI/netI     0.1682 
_diffrn_reflns_limit_h_min        -12 
_diffrn_reflns_limit_h_max        12 
_diffrn_reflns_limit_k_min        -15 
_diffrn_reflns_limit_k_max        15 
_diffrn_reflns_limit_l_min        -14 
_diffrn_reflns_limit_l_max        14 
_diffrn_reflns_theta_min          2.26 
_diffrn_reflns_theta_max          25.10 
_reflns_number_total              6225 
_reflns_number_gt                 3754 
_reflns_threshold_expression      >2sigma(I) 
 
_computing_data_collection        'CAD4 (Enraf-Nonius, 1977)'
_computing_cell_refinement        'CAD4 (Enraf-Nonius, 1977)'
_computing_data_reduction         'PROCESS_MolEN (Fair, 1990)'
_computing_structure_solution     'SHELXTL (Sheldrick, 1998)' 
_computing_structure_refinement   'SHELXTL (Sheldrick, 1998)' 
_computing_molecular_graphics     'Platon (Spek, 2003)'
_computing_publication_material   ? 
 
_refine_special_details 
; 
 Refinement of F^2^ against ALL reflections.  The weighted R-factor wR and 
 goodness of fit S are based on F^2^, conventional R-factors R are based 
 on F, with F set to zero for negative F^2^. The threshold expression of 
 F^2^ > 2sigma(F^2^) is used only for calculating R-factors(gt) etc. and is 
 not relevant to the choice of reflections for refinement.  R-factors based 
 on F^2^ are statistically about twice as large as those based on F, and R- 
 factors based on ALL data will be even larger. 
; 
 
_refine_ls_structure_factor_coef  Fsqd  
_refine_ls_matrix_type            full 
_refine_ls_weighting_scheme       calc  
_refine_ls_weighting_details 
 'calc w=1/[\s^2^(Fo^2^)+(0.1400P)^2^+0.0000P] where P=(Fo^2^+2Fc^2^)/3' 
_atom_sites_solution_primary      direct 
_atom_sites_solution_secondary    difmap 
_atom_sites_solution_hydrogens    geom 
_refine_ls_hydrogen_treatment     constr
_refine_ls_extinction_method      none 
_refine_ls_extinction_coef        ? 
_refine_ls_abs_structure_details 
 'Flack H D (1983), Acta Cryst. A39, 876-881' 
_refine_ls_abs_structure_Flack    0.00(6) 
_refine_ls_number_reflns          6225 
_refine_ls_number_parameters      391 
_refine_ls_number_restraints      1 
_refine_ls_R_factor_all           0.1656 
_refine_ls_R_factor_gt            0.1000 
_refine_ls_wR_factor_ref          0.2592 
_refine_ls_wR_factor_gt           0.2259 
_refine_ls_goodness_of_fit_ref    1.007 
_refine_ls_restrained_S_all       1.007 
_refine_ls_shift/su_max           0.011 
_refine_ls_shift/su_mean          0.000 
 
loop_ 
 _atom_site_label 
 _atom_site_type_symbol 
 _atom_site_fract_x 
 _atom_site_fract_y 
 _atom_site_fract_z 
 _atom_site_U_iso_or_equiv 
 _atom_site_adp_type 
 _atom_site_occupancy 
 _atom_site_symmetry_multiplicity 
 _atom_site_calc_flag 
 _atom_site_refinement_flags 
 _atom_site_disorder_assembly 
 _atom_site_disorder_group 
Cr Cr 0.60320(13) 0.20386(12) 0.23650(11) 0.0304(4) Uani 1 1 d . . . 
P1 P 0.7932(2) 0.0170(2) 0.4179(2) 0.0341(7) Uani 1 1 d . . . 
P2 P 0.5405(2) -0.1450(2) 0.35144(19) 0.0321(6) Uani 1 1 d . . . 
O1 O 0.8217(8) 0.3477(7) 0.2665(7) 0.065(2) Uani 1 1 d . . . 
O2 O 0.4678(9) 0.3452(7) 0.0678(6) 0.063(2) Uani 1 1 d . . . 
O3 O 0.7096(8) 0.0875(7) 0.0693(7) 0.065(2) Uani 1 1 d . . . 
C1 C 0.7402(10) 0.2893(9) 0.2565(8) 0.041(3) Uani 1 1 d . . . 
C2 C 0.5209(10) 0.2906(8) 0.1321(8) 0.036(2) Uani 1 1 d . . . 
C3 C 0.6713(10) 0.1342(8) 0.1329(8) 0.036(2) Uani 1 1 d . . . 
C11 C 0.6508(8) 0.0939(7) 0.3730(7) 0.027(2) Uani 1 1 d . . . 
C12 C 0.5510(8) 0.0552(7) 0.2947(7) 0.028(2) Uani 1 1 d . . . 
C13 C 0.4382(9) 0.1105(8) 0.2601(7) 0.030(2) Uani 1 1 d . . . 
C14 C 0.4261(8) 0.2063(9) 0.3000(6) 0.033(2) Uani 1 1 d . . . 
H14 H 0.3516 0.2428 0.2749 0.043 Uiso 1 1 d R . . 
C15 C 0.5251(10) 0.2478(9) 0.3786(8) 0.040(3) Uani 1 1 d . . . 
H15 H 0.5163 0.3131 0.4061 0.052 Uiso 1 1 d R . . 
C16 C 0.6372(9) 0.1924(9) 0.4146(7) 0.035(2) Uani 1 1 d . . . 
H16 H 0.7028 0.2189 0.4672 0.046 Uiso 1 1 d R . . 
C17 C 0.5430(9) -0.0465(8) 0.2437(7) 0.031(2) Uani 1 1 d . . . 
H17 H 0.6193 -0.0570 0.2116 0.040 Uiso 1 1 d R . . 
C18 C 0.4255(10) -0.0372(8) 0.1486(8) 0.037(2) Uani 1 1 d . . . 
H18A H 0.4536 -0.0212 0.0804 0.047 Uiso 1 1 d R . . 
H18B H 0.3763 -0.0999 0.1387 0.047 Uiso 1 1 d R . . 
C19 C 0.3472(9) 0.0513(8) 0.1794(7) 0.032(2) Uani 1 1 d . . . 
H19A H 0.3111 0.0928 0.1164 0.042 Uiso 1 1 d R . . 
H19B H 0.2787 0.0255 0.2135 0.042 Uiso 1 1 d R . . 
C21 C 0.7924(10) 0.0075(9) 0.5641(8) 0.037(2) Uani 1 1 d . . . 
C22 C 0.9015(11) -0.0226(11) 0.6336(9) 0.054(3) Uani 1 1 d . . . 
H22 H 0.9757 -0.0324 0.6057 0.070 Uiso 1 1 d R . . 
C23 C 0.9052(11) -0.0400(12) 0.7424(9) 0.065(4) Uani 1 1 d . . . 
H23 H 0.9806 -0.0598 0.7881 0.085 Uiso 1 1 d R . . 
C24 C 0.7928(13) -0.0294(12) 0.7841(9) 0.067(4) Uani 1 1 d . . . 
H24 H 0.7936 -0.0426 0.8581 0.087 Uiso 1 1 d R . . 
C25 C 0.6833(11) -0.0020(11) 0.7159(8) 0.056(3) Uani 1 1 d . . . 
H25 H 0.6079 0.0048 0.7429 0.073 Uiso 1 1 d R . . 
C26 C 0.6829(10) 0.0183(9) 0.6079(9) 0.041(3) Uani 1 1 d . . . 
H26 H 0.6072 0.0370 0.5620 0.054 Uiso 1 1 d R . . 
C31 C 0.9230(9) 0.1058(8) 0.4119(8) 0.037(3) Uani 1 1 d . . . 
C32 C 0.9704(10) 0.1083(10) 0.3148(10) 0.054(3) Uani 1 1 d . . . 
H32 H 0.9359 0.0664 0.2560 0.070 Uiso 1 1 d R . . 
C33 C 1.0674(12) 0.1706(11) 0.3078(12) 0.068(4) Uani 1 1 d . . . 
H33 H 1.0934 0.1757 0.2403 0.089 Uiso 1 1 d R . . 
C34 C 1.1282(12) 0.2294(11) 0.3930(14) 0.077(5) Uani 1 1 d . . . 
H34 H 1.1978 0.2702 0.3864 0.100 Uiso 1 1 d R . . 
C35 C 1.0831(11) 0.2255(13) 0.4882(13) 0.076(5) Uani 1 1 d . . . 
H35 H 1.1233 0.2627 0.5489 0.098 Uiso 1 1 d R . . 
C36 C 0.9818(10) 0.1646(9) 0.4981(10) 0.055(3) Uani 1 1 d . . . 
H36 H 0.9506 0.1649 0.5635 0.071 Uiso 1 1 d R . . 
C41 C 0.5705(9) -0.2614(9) 0.2836(8) 0.041(3) Uani 1 1 d . . . 
C42 C 0.6238(11) -0.3421(9) 0.3461(9) 0.048(3) Uani 1 1 d . . . 
H42 H 0.6419 -0.3363 0.4223 0.062 Uiso 1 1 d R . . 
C43 C 0.6559(12) -0.4304(9) 0.3020(10) 0.057(3) Uani 1 1 d . . . 
H43 H 0.6885 -0.4843 0.3477 0.074 Uiso 1 1 d R . . 
C44 C 0.6375(11) -0.4419(9) 0.1911(9) 0.051(3) Uani 1 1 d . . . 
H44 H 0.6602 -0.5025 0.1604 0.066 Uiso 1 1 d R . . 
C45 C 0.5841(12) -0.3654(10) 0.1273(9) 0.053(3) Uani 1 1 d . . . 
H45 H 0.5686 -0.3734 0.0513 0.069 Uiso 1 1 d R . . 
C46 C 0.5525(12) -0.2746(9) 0.1706(8) 0.054(3) Uani 1 1 d . . . 
H46 H 0.5209 -0.2213 0.1236 0.070 Uiso 1 1 d R . . 
C51 C 0.3704(9) -0.1478(7) 0.3549(7) 0.029(2) Uani 1 1 d . . . 
C52 C 0.3292(11) -0.0744(9) 0.4200(8) 0.045(3) Uani 1 1 d . . . 
H52 H 0.3875 -0.0302 0.4613 0.059 Uiso 1 1 d R . . 
C53 C 0.2026(12) -0.0677(10) 0.4224(9) 0.048(3) Uani 1 1 d . . . 
H53 H 0.1734 -0.0181 0.4656 0.063 Uiso 1 1 d R . . 
C54 C 0.1159(11) -0.1307(11) 0.3613(10) 0.057(4) Uani 1 1 d . . . 
H54 H 0.0291 -0.1238 0.3613 0.074 Uiso 1 1 d R . . 
C55 C 0.1575(11) -0.2044(11) 0.3010(10) 0.054(3) Uani 1 1 d . . . 
H55 H 0.0986 -0.2506 0.2637 0.071 Uiso 1 1 d R . . 
C56 C 0.2860(9) -0.2126(8) 0.2972(7) 0.034(2) Uani 1 1 d . . . 
H56 H 0.3133 -0.2627 0.2536 0.045 Uiso 1 1 d R . . 
C61 C 0.0286(14) 0.7020(8) 0.0193(11) 0.122(6) Uiso 1 1 d G . . 
H61 H 0.0588 0.6377 0.0047 0.158 Uiso 1 1 calc R . . 
C62 C -0.0835(14) 0.7109(10) 0.0583(11) 0.161(9) Uiso 1 1 d G . . 
H62 H -0.1291 0.6526 0.0701 0.210 Uiso 1 1 calc R . . 
C63 C -0.1282(11) 0.8059(13) 0.0799(10) 0.128(7) Uiso 1 1 d G . . 
H63 H -0.2040 0.8120 0.1063 0.167 Uiso 1 1 calc R . . 
C64 C -0.0607(13) 0.8921(9) 0.0626(10) 0.106(6) Uiso 1 1 d G . . 
H64 H -0.0909 0.9564 0.0772 0.138 Uiso 1 1 calc R . . 
C65 C 0.0514(12) 0.8832(9) 0.0236(10) 0.107(6) Uiso 1 1 d G . . 
H65 H 0.0971 0.9414 0.0118 0.140 Uiso 1 1 calc R . . 
C66 C 0.0961(10) 0.7881(12) 0.0019(10) 0.118(7) Uiso 1 1 d G . . 
H66 H 0.1719 0.7821 -0.0244 0.153 Uiso 1 1 calc R . . 
 
loop_ 
 _atom_site_aniso_label 
 _atom_site_aniso_U_11 
 _atom_site_aniso_U_22 
 _atom_site_aniso_U_33 
 _atom_site_aniso_U_23 
 _atom_site_aniso_U_13 
 _atom_site_aniso_U_12 
Cr 0.0248(8) 0.0363(9) 0.0327(8) -0.0003(8) 0.0120(6) -0.0009(8) 
P1 0.0259(14) 0.0437(17) 0.0328(13) -0.0016(12) 0.0060(11) 0.0061(13) 
P2 0.0336(14) 0.0365(15) 0.0265(12) 0.0047(11) 0.0059(10) 0.0002(13) 
O1 0.039(5) 0.059(6) 0.096(7) 0.004(5) 0.012(4) -0.011(5) 
O2 0.075(6) 0.072(6) 0.045(4) 0.015(5) 0.016(4) 0.012(5) 
O3 0.065(6) 0.073(6) 0.067(5) -0.012(5) 0.042(5) 0.005(5) 
C1 0.032(6) 0.050(7) 0.043(6) -0.003(5) 0.008(5) -0.006(6) 
C2 0.040(6) 0.034(6) 0.036(5) -0.005(5) 0.015(5) -0.004(5) 
C3 0.031(6) 0.036(6) 0.045(6) 0.005(5) 0.013(5) -0.004(5) 
C11 0.019(5) 0.033(6) 0.029(5) 0.002(4) 0.009(4) 0.000(4) 
C12 0.022(5) 0.030(6) 0.033(5) 0.014(4) 0.008(4) 0.005(4) 
C13 0.027(5) 0.038(6) 0.029(5) 0.001(5) 0.010(4) -0.009(5) 
C14 0.030(5) 0.043(6) 0.029(4) 0.012(5) 0.016(4) 0.012(6) 
C15 0.038(6) 0.048(6) 0.038(6) -0.005(5) 0.021(5) -0.004(5) 
C16 0.034(5) 0.046(6) 0.025(4) -0.006(5) 0.002(4) -0.006(6) 
C17 0.023(5) 0.040(6) 0.030(5) -0.004(4) 0.005(4) 0.000(5) 
C18 0.045(6) 0.033(6) 0.030(5) 0.005(4) 0.001(5) -0.006(5) 
C19 0.022(5) 0.038(6) 0.036(5) 0.009(5) 0.005(4) 0.002(5) 
C21 0.039(6) 0.044(6) 0.032(5) 0.001(5) 0.015(4) 0.009(5) 
C22 0.029(6) 0.087(10) 0.040(6) 0.005(6) -0.006(5) 0.008(6) 
C23 0.038(7) 0.115(12) 0.038(6) 0.005(7) -0.005(5) 0.036(8) 
C24 0.076(10) 0.090(10) 0.034(6) 0.015(6) 0.010(6) 0.028(8) 
C25 0.044(7) 0.093(10) 0.035(6) 0.013(6) 0.016(5) -0.005(7) 
C26 0.028(6) 0.049(7) 0.047(6) 0.007(5) 0.008(5) 0.014(5) 
C31 0.015(5) 0.048(7) 0.050(6) -0.007(5) 0.008(4) -0.001(5) 
C32 0.027(6) 0.074(9) 0.065(7) 0.008(7) 0.021(5) 0.014(6) 
C33 0.039(7) 0.079(11) 0.097(10) 0.004(8) 0.037(7) 0.013(7) 
C34 0.030(7) 0.066(11) 0.147(14) -0.020(10) 0.049(8) -0.006(7) 
C35 0.031(6) 0.092(13) 0.110(11) -0.018(10) 0.030(7) -0.008(7) 
C36 0.027(6) 0.064(8) 0.079(8) -0.025(6) 0.025(6) -0.003(6) 
C41 0.022(5) 0.063(8) 0.041(6) 0.005(5) 0.015(4) -0.007(5) 
C42 0.050(7) 0.054(7) 0.039(6) 0.000(5) 0.005(5) 0.007(6) 
C43 0.070(9) 0.037(7) 0.062(8) 0.017(6) 0.012(6) 0.010(6) 
C44 0.053(8) 0.042(7) 0.057(7) -0.002(6) 0.009(6) 0.017(6) 
C45 0.062(8) 0.057(8) 0.042(6) -0.007(6) 0.011(6) 0.001(7) 
C46 0.081(9) 0.048(8) 0.031(5) -0.004(5) 0.007(5) 0.021(7) 
C51 0.038(5) 0.025(5) 0.024(4) 0.001(4) 0.008(4) -0.007(5) 
C52 0.050(7) 0.052(8) 0.036(5) 0.003(5) 0.016(5) -0.004(6) 
C53 0.050(7) 0.063(8) 0.035(6) 0.002(6) 0.017(5) 0.004(6) 
C54 0.036(7) 0.081(10) 0.058(7) 0.018(7) 0.016(6) 0.016(7) 
C55 0.030(6) 0.072(9) 0.058(7) 0.014(7) 0.000(5) -0.007(6) 
C56 0.036(6) 0.038(6) 0.032(5) 0.002(4) 0.013(4) 0.002(5) 
 
_geom_special_details 
; 
 All esds (except the esd in the dihedral angle between two l.s. planes) 
 are estimated using the full covariance matrix.  The cell esds are taken 
 into account individually in the estimation of esds in distances, angles 
 and torsion angles; correlations between esds in cell parameters are only 
 used when they are defined by crystal symmetry.  An approximate (isotropic) 
 treatment of cell esds is used for estimating esds involving l.s. planes. 
; 
 
loop_ 
 _geom_bond_atom_site_label_1 
 _geom_bond_atom_site_label_2 
 _geom_bond_distance 
 _geom_bond_site_symmetry_2 
 _geom_bond_publ_flag 
Cr C2 1.838(11) . ? 
Cr C1 1.840(11) . ? 
Cr C3 1.849(11) . ? 
Cr C15 2.182(10) . ? 
Cr C16 2.195(8) . ? 
Cr C14 2.200(8) . ? 
Cr C12 2.206(9) . ? 
Cr C13 2.229(9) . ? 
Cr C11 2.229(9) . ? 
P1 C21 1.836(10) . ? 
P1 C11 1.840(10) . ? 
P1 C31 1.839(10) . ? 
P2 C41 1.816(11) . ? 
P2 C51 1.843(10) . ? 
P2 C17 1.878(10) . ? 
O1 C1 1.158(13) . ? 
O2 C2 1.152(12) . ? 
O3 C3 1.143(12) . ? 
C11 C12 1.411(12) . ? 
C11 C16 1.420(14) . ? 
C12 C13 1.416(13) . ? 
C12 C17 1.483(14) . ? 
C13 C14 1.375(15) . ? 
C13 C19 1.492(13) . ? 
C14 C15 1.421(14) . ? 
C14 H14 0.9401 . ? 
C15 C16 1.414(14) . ? 
C15 H15 0.9400 . ? 
C16 H16 0.9399 . ? 
C17 C18 1.575(13) . ? 
C17 H17 0.9901 . ? 
C18 C19 1.533(14) . ? 
C18 H18A 0.9801 . ? 
C18 H18B 0.9800 . ? 
C19 H19A 0.9800 . ? 
C19 H19B 0.9801 . ? 
C21 C22 1.385(14) . ? 
C21 C26 1.398(14) . ? 
C22 C23 1.374(16) . ? 
C22 H22 0.9400 . ? 
C23 C24 1.413(17) . ? 
C23 H23 0.9400 . ? 
C24 C25 1.371(16) . ? 
C24 H24 0.9400 . ? 
C25 C26 1.377(14) . ? 
C25 H25 0.9400 . ? 
C26 H26 0.9399 . ? 
C31 C36 1.384(15) . ? 
C31 C32 1.404(15) . ? 
C32 C33 1.347(17) . ? 
C32 H32 0.9400 . ? 
C33 C34 1.383(19) . ? 
C33 H33 0.9399 . ? 
C34 C35 1.368(19) . ? 
C34 H34 0.9400 . ? 
C35 C36 1.380(17) . ? 
C35 H35 0.9401 . ? 
C36 H36 0.9400 . ? 
C41 C42 1.382(15) . ? 
C41 C46 1.401(14) . ? 
C42 C43 1.364(16) . ? 
C42 H42 0.9400 . ? 
C43 C44 1.373(16) . ? 
C43 H43 0.9400 . ? 
C44 C45 1.349(16) . ? 
C44 H44 0.9401 . ? 
C45 C46 1.386(16) . ? 
C45 H45 0.9399 . ? 
C46 H46 0.9400 . ? 
C51 C56 1.355(13) . ? 
C51 C52 1.392(14) . ? 
C52 C53 1.374(16) . ? 
C52 H52 0.9400 . ? 
C53 C54 1.374(18) . ? 
C53 H53 0.9399 . ? 
C54 C55 1.359(18) . ? 
C54 H54 0.9401 . ? 
C55 C56 1.399(14) . ? 
C55 H55 0.9401 . ? 
C56 H56 0.9400 . ? 
C61 C62 1.3900 . ? 
C61 C66 1.3900 . ? 
C61 H61 0.9400 . ? 
C62 C63 1.3900 . ? 
C62 H62 0.9400 . ? 
C63 C64 1.3900 . ? 
C63 H63 0.9400 . ? 
C64 C65 1.3900 . ? 
C64 H64 0.9400 . ? 
C65 C66 1.3900 . ? 
C65 H65 0.9400 . ? 
C66 H66 0.9400 . ? 
 
loop_ 
 _geom_angle_atom_site_label_1 
 _geom_angle_atom_site_label_2 
 _geom_angle_atom_site_label_3 
 _geom_angle 
 _geom_angle_site_symmetry_1 
 _geom_angle_site_symmetry_3 
 _geom_angle_publ_flag 
C2 Cr C1 89.1(5) . . ? 
C2 Cr C3 90.9(4) . . ? 
C1 Cr C3 89.3(5) . . ? 
C2 Cr C15 101.8(4) . . ? 
C1 Cr C15 98.5(4) . . ? 
C3 Cr C15 165.2(4) . . ? 
C2 Cr C16 137.1(4) . . ? 
C1 Cr C16 85.7(4) . . ? 
C3 Cr C16 131.6(4) . . ? 
C15 Cr C16 37.7(4) . . ? 
C2 Cr C14 84.9(4) . . ? 
C1 Cr C14 132.1(5) . . ? 
C3 Cr C14 138.1(4) . . ? 
C15 Cr C14 37.8(4) . . ? 
C16 Cr C14 68.1(3) . . ? 
C2 Cr C12 132.2(4) . . ? 
C1 Cr C12 138.6(4) . . ? 
C3 Cr C12 86.9(4) . . ? 
C15 Cr C12 78.9(4) . . ? 
C16 Cr C12 66.9(4) . . ? 
C14 Cr C12 66.5(4) . . ? 
C2 Cr C13 98.5(4) . . ? 
C1 Cr C13 164.2(4) . . ? 
C3 Cr C13 104.3(4) . . ? 
C15 Cr C13 66.5(4) . . ? 
C16 Cr C13 79.3(4) . . ? 
C14 Cr C13 36.2(4) . . ? 
C12 Cr C13 37.2(3) . . ? 
C2 Cr C11 164.5(4) . . ? 
C1 Cr C11 103.4(4) . . ? 
C3 Cr C11 98.5(4) . . ? 
C15 Cr C11 67.6(4) . . ? 
C16 Cr C11 37.4(4) . . ? 
C14 Cr C11 79.9(3) . . ? 
C12 Cr C11 37.1(3) . . ? 
C13 Cr C11 67.3(3) . . ? 
C21 P1 C11 100.6(4) . . ? 
C21 P1 C31 103.2(5) . . ? 
C11 P1 C31 103.5(5) . . ? 
C41 P2 C51 104.9(4) . . ? 
C41 P2 C17 103.0(4) . . ? 
C51 P2 C17 100.2(4) . . ? 
O1 C1 Cr 175.9(10) . . ? 
O2 C2 Cr 178.8(9) . . ? 
O3 C3 Cr 176.8(9) . . ? 
C12 C11 C16 118.0(8) . . ? 
C12 C11 P1 119.8(7) . . ? 
C16 C11 P1 122.2(7) . . ? 
C12 C11 Cr 70.5(5) . . ? 
C16 C11 Cr 70.0(5) . . ? 
P1 C11 Cr 130.9(4) . . ? 
C11 C12 C13 121.7(9) . . ? 
C11 C12 C17 127.1(8) . . ? 
C13 C12 C17 111.0(8) . . ? 
C11 C12 Cr 72.4(5) . . ? 
C13 C12 Cr 72.3(5) . . ? 
C17 C12 Cr 131.5(6) . . ? 
C14 C13 C12 119.9(8) . . ? 
C14 C13 C19 129.3(9) . . ? 
C12 C13 C19 110.8(9) . . ? 
C14 C13 Cr 70.8(5) . . ? 
C12 C13 Cr 70.5(5) . . ? 
C19 C13 Cr 129.9(6) . . ? 
C13 C14 C15 119.8(9) . . ? 
C13 C14 Cr 73.1(5) . . ? 
C15 C14 Cr 70.4(5) . . ? 
C13 C14 H14 118.9 . . ? 
C15 C14 H14 121.2 . . ? 
Cr C14 H14 129.2 . . ? 
C16 C15 C14 120.5(10) . . ? 
C16 C15 Cr 71.6(5) . . ? 
C14 C15 Cr 71.8(5) . . ? 
C16 C15 H15 119.9 . . ? 
C14 C15 H15 119.6 . . ? 
Cr C15 H15 128.6 . . ? 
C15 C16 C11 119.9(9) . . ? 
C15 C16 Cr 70.7(5) . . ? 
C11 C16 Cr 72.6(5) . . ? 
C15 C16 H16 121.1 . . ? 
C11 C16 H16 118.9 . . ? 
Cr C16 H16 130.4 . . ? 
C12 C17 C18 103.2(8) . . ? 
C12 C17 P2 109.1(6) . . ? 
C18 C17 P2 118.7(7) . . ? 
C12 C17 H17 108.4 . . ? 
C18 C17 H17 108.5 . . ? 
P2 C17 H17 108.5 . . ? 
C19 C18 C17 105.8(8) . . ? 
C19 C18 H18A 109.2 . . ? 
C17 C18 H18A 109.8 . . ? 
C19 C18 H18B 111.5 . . ? 
C17 C18 H18B 111.7 . . ? 
H18A C18 H18B 108.8 . . ? 
C13 C19 C18 104.3(8) . . ? 
C13 C19 H19A 111.4 . . ? 
C18 C19 H19A 112.3 . . ? 
C13 C19 H19B 110.0 . . ? 
C18 C19 H19B 109.7 . . ? 
H19A C19 H19B 109.0 . . ? 
C22 C21 C26 117.6(10) . . ? 
C22 C21 P1 119.0(8) . . ? 
C26 C21 P1 123.0(8) . . ? 
C23 C22 C21 122.4(11) . . ? 
C23 C22 H22 118.4 . . ? 
C21 C22 H22 119.3 . . ? 
C22 C23 C24 118.7(10) . . ? 
C22 C23 H23 120.8 . . ? 
C24 C23 H23 120.5 . . ? 
C25 C24 C23 119.7(10) . . ? 
C25 C24 H24 120.8 . . ? 
C23 C24 H24 119.5 . . ? 
C24 C25 C26 120.5(11) . . ? 
C24 C25 H25 120.2 . . ? 
C26 C25 H25 119.2 . . ? 
C25 C26 C21 121.1(10) . . ? 
C25 C26 H26 119.7 . . ? 
C21 C26 H26 119.2 . . ? 
C36 C31 C32 118.3(10) . . ? 
C36 C31 P1 124.7(8) . . ? 
C32 C31 P1 116.8(8) . . ? 
C33 C32 C31 118.8(13) . . ? 
C33 C32 H32 120.6 . . ? 
C31 C32 H32 120.6 . . ? 
C32 C33 C34 123.8(13) . . ? 
C32 C33 H33 117.8 . . ? 
C34 C33 H33 118.3 . . ? 
C35 C34 C33 117.1(12) . . ? 
C35 C34 H34 121.1 . . ? 
C33 C34 H34 121.8 . . ? 
C34 C35 C36 121.0(14) . . ? 
C34 C35 H35 119.9 . . ? 
C36 C35 H35 119.0 . . ? 
C35 C36 C31 120.8(11) . . ? 
C35 C36 H36 119.5 . . ? 
C31 C36 H36 119.6 . . ? 
C42 C41 C46 116.1(10) . . ? 
C42 C41 P2 118.7(8) . . ? 
C46 C41 P2 125.0(9) . . ? 
C43 C42 C41 122.8(10) . . ? 
C43 C42 H42 117.3 . . ? 
C41 C42 H42 119.8 . . ? 
C42 C43 C44 120.2(11) . . ? 
C42 C43 H43 119.9 . . ? 
C44 C43 H43 119.9 . . ? 
C45 C44 C43 118.8(11) . . ? 
C45 C44 H44 120.7 . . ? 
C43 C44 H44 120.5 . . ? 
C44 C45 C46 121.8(10) . . ? 
C44 C45 H45 119.4 . . ? 
C46 C45 H45 118.9 . . ? 
C45 C46 C41 120.3(11) . . ? 
C45 C46 H46 119.4 . . ? 
C41 C46 H46 120.3 . . ? 
C56 C51 C52 119.8(9) . . ? 
C56 C51 P2 125.0(8) . . ? 
C52 C51 P2 115.2(8) . . ? 
C53 C52 C51 119.0(11) . . ? 
C53 C52 H52 120.9 . . ? 
C51 C52 H52 120.2 . . ? 
C54 C53 C52 121.7(12) . . ? 
C54 C53 H53 118.5 . . ? 
C52 C53 H53 119.9 . . ? 
C55 C54 C53 118.9(11) . . ? 
C55 C54 H54 120.0 . . ? 
C53 C54 H54 121.1 . . ? 
C54 C55 C56 120.3(12) . . ? 
C54 C55 H55 118.6 . . ? 
C56 C55 H55 121.0 . . ? 
C51 C56 C55 120.3(10) . . ? 
C51 C56 H56 120.2 . . ? 
C55 C56 H56 119.5 . . ? 
C62 C61 C66 120.0 . . ? 
C62 C61 H61 120.0 . . ? 
C66 C61 H61 120.0 . . ? 
C63 C62 C61 120.0 . . ? 
C63 C62 H62 120.0 . . ? 
C61 C62 H62 120.0 . . ? 
C62 C63 C64 120.0 . . ? 
C62 C63 H63 120.0 . . ? 
C64 C63 H63 120.0 . . ? 
C65 C64 C63 120.0 . . ? 
C65 C64 H64 120.0 . . ? 
C63 C64 H64 120.0 . . ? 
C64 C65 C66 120.0 . . ? 
C64 C65 H65 120.0 . . ? 
C66 C65 H65 120.0 . . ? 
C65 C66 C61 120.0 . . ? 
C65 C66 H66 120.0 . . ? 
C61 C66 H66 120.0 . . ? 
 
_diffrn_measured_fraction_theta_max    0.999 
_diffrn_reflns_theta_full              25.10 
_diffrn_measured_fraction_theta_full   0.999 
_refine_diff_density_max    1.013 
_refine_diff_density_min   -0.604 
_refine_diff_density_rms    0.126 
